# Supplementary material for: Resistance to Innovation and Entrepreneurship in Promotion and Tenure Evaluation at Universities
Source: Research Square preprint supplement (doi:10.21203/rs.3.rs-5611435/v1), 2025-04-14
Supplement: Supplementary file 1 [file bb468812dae2697194e2a4c3.docx]

**Supplementary Materials**

Resistance to Innovation and Entrepreneurship in Promotion and Tenure Evaluation at Universities

**This PDF file includes:**

Appendix 1: Innovation and Entrepreneurship dictionary terms for linguistic analyses (LIWC).

Appendix 2: Rubric-Interventions used in third study.

Tables S1 to S21.

**Appendix 1**

Dictionary for Innovation and Entrepreneurship (I&E) language used in P&T study (Study 1). This dictionary was developed using a Delphi panel process involving university administrators and I&E researchers, we created a dictionary for LIWC consisting of phrases and terminology reflecting innovation and entrepreneurship in P&T processes

| actualize | concoct | found | litigat* | series B |
| --- | --- | --- | --- | --- |
| angel investor* | construct | foundation | LLC | series C |
| brand* | contrive | franchise | modernization | set up |
| breakthrough | copyright | general purpose technology | non-profit | shape |
| bring into being | corporation | generate | novelty | software |
| bring into existence | creat* | give birth to | organize | spawn |
| build | cutting edge | GPT | originate | sponsored |
| business | design | hatch | own* | start |
| capital | develop* | holding | partnership | start up |
| change | discover | incubat* | patent* | start-up |
| charter | dream up | industry | permit | startup |
| class | entrepreneur* | innovat* | pioneer | syndicate |
| clinical trial | EPO | Intellectual property | product | technology |
| coin | erect | invent* | propriet* | trademark |
| commercial viability | establish | invention disclosure | protection | translational |
| commercialization | european patent office | invest | R&D | TTO |
| commissioned | fabricate | IP | radical | unearth |
| compan* | fashion | japan patent office | research and design | USPTO |
| compose | forge | JPO | royalt* | venture |
| conceive | form | licens* | SBIR | white paper |
| concession | formulate | limited | series A |  |

**Appendix 2**

Rubric-Intervention used in the third study. For “entrepreneurial activities,” the framing varied across conditions, but the other criteria remained the same. In the control condition, no information was provided

| **Promotion and Tenure Criteria** | **Rubric Information** |
| --- | --- |
| **Entrepreneurial Activities**  **(e.g., Patents Filed and Received)** | ***Societal Benefit Framing***  Patents and other entrepreneurial activities have a significant impact on society, with a significant portion of medicines (e.g., over a third of cancer medicines, Kinch et al., 2020) including COVID-19 vaccines (e.g., AstraZeneca) and numerous technological advancements coming from university-based researchers. Therefore, rewarding candidates for this work increases the societal impact of academic research.    ***Dispelling Productivity Myth Framing***  Faculty who engage in patents and other entrepreneurial activities are able to maintain or even increase their scholarly output due in part to their increased industry connections, in some fields leading to more publications in high impact journals (Zinner et al., 2009). Therefore, engaging in entrepreneurial activities enhances a candidate's other outputs (Sanberg et al., 2014).    ***Financial Benefit (Institution)***  Entrepreneurial activities can generate funding to support graduate student assistantships, post-doctoral researchers, and sometimes contribute to the buildout of shared university resources, while also strengthening philanthropic relationships with industry partners.    ***Financial Benefit (Personal)***  Faculty who engage in patents and other entrepreneurial activities benefit as they often become owners or co-owners of startups and the intellectual property generated through their work. |
| **Publication Metrics**  **(e.g., H Index and Total Citations)** | Metrics can provide a standardized approach to quantifying the impact of a faculty member's research. This allows faculty to be compared using the same measuring stick. |
| **Research Quality**  **(e.g., Subjective Assessment of Quality)** | P&T committee members' analysis of the quality of a candidate’s research, through reviewing their scholarly output, allows for a more in-depth analysis of the value of a candidate's scholarship. |
| **Funding**  **(e.g., Grants)** | Faculty funding demonstrates that a panel of experts reviewed their work and deemed it meritorious enough to receive funding in a competitive process, underlying the value of the candidate’s contributions. |
| **Teaching**  **(e.g., Student Evaluation and Teaching Observation)** | A strong teaching record demonstrates that a candidate significantly contributes to the education of students. |
| **Service**  **(e.g., Students supervised, # of Internal Committees, and Journal Reviews)** | A strong service record demonstrates that a candidate significantly contributes to their institution, department, and discipline. |

| Effect | Model 1 | | Model 2 | | Model 3 | |
| --- | --- | --- | --- | --- | --- | --- |
| Fixed Effects | Est | SE | Est | SE | Est | SE |
| Candidate patent count | 0.01*** | 0.001 | 0.01*** | 0.001 | 0.01*** | 0.001 |
| Promotion to full professor | 0.003 | 0.01 | -0.02 | 0.02 | -0.02 | 0.02 |
| Candidate h-index |  |  | -0.001 | 0.001 | -0.001 | 0.001 |
| PI grants |  |  | 0.005*** | 0.001 | 0.004*** | 0.001 |
| Candidate gender |  |  |  |  | -0.03 | 0.001 |
| Candidate URM |  |  |  |  | 0.003 | 0.02 |
| Random Effects | Var | SD | Var | SD | Var | SD |
| P&T candidate | 0.02 | 0.14 | 0.02 | 0.13 | 0.02 | 0.13 |
| Error | 0.08 | 0.28 | 0.08 | 0.29 | 0.08 | 0.29 |
| Observations | 4039 | | 3276 | | 3262 | |
| Marginal *R*2 | .10 | | .12 | | .12 | |
| Conditional *R*2 | .26 | | .26 | | .26 | |

**Table S1. Multilevel regression results for candidate patent count predicting I&E language.** Promotion to full professor is coded 1 for candidates seeking Promotion to full professor and 0 for candidates seeking promotion to associate professor. with tenure Candidate h-index is centered at the grand mean. PI grants refers to the number of external grants awarded as principal investigator. Candidate gender is coded 1 for women and 0 for men. Candidate URM is coded 1 for URM candidates and 0 for non-URM candidates. Institution and discipline are also included as controls for all three models but are not presented due to the large number of parameters. * p < .05; ** p < .01; *** p < .001.

| Effect | Model 1 | | Model 2 | | Model 3 | |
| --- | --- | --- | --- | --- | --- | --- |
| Fixed Effects | Est | SE | Est | SE | Est | SE |
| Has patent | 0.08*** | 0.02 | 0.09*** | 0.02 | 0.09*** | 0.02 |
| Promotion to full professor | 0.01 | 0.01 | -0.01 | 0.02 | -0.01 | 0.02 |
| Candidate h-index |  |  | -0.001 | 0.001 | -0.001 | 0.001 |
| PI grants |  |  | 0.004*** | 0.001 | 0.004** | 0.001 |
| Candidate gender |  |  |  |  | -0.02 | 0.02 |
| Candidate URM |  |  |  |  | -0.003 | 0.03 |
| Random Effects | Var | SD | Var | SD | Var | SD |
| P&T candidate | 0.02 | 0.14 | 0.02 | 0.13 | 0.02 | 0.13 |
| Error | 0.08 | 0.28 | 0.08 | 0.29 | 0.08 | 0.29 |
| Observations | 4039 | | 3276 | | 3262 | |
| Marginal *R*2 | .10 | | .12 | | .12 | |
| Conditional *R*2 | .27 | | .26 | | .27 | |

**Table S2. Multilevel regression results for having a patent predicting I&E language.** Promotion to full professor is coded 1 for candidates seeking Promotion to full professor and 0 for candidates seeking promotion to associate professor. with tenure Candidate h-index is centered at the grand mean. PI grants refers to the number of external grants awarded as principal investigator. Candidate gender is coded 1 for women and 0 for men. Candidate URM is coded 1 for URM candidates and 0 for non-URM candidates. Institution and discipline are also included as controls for all three models but are not presented due to the large number of parameters. * p < .05; ** p < .01; *** p < .001.

| Effect | Model 1 | | Model 2 | | Model 3 | |
| --- | --- | --- | --- | --- | --- | --- |
| Fixed Effects | Est | SE | Est | SE | Est | SE |
| Letter writer patent count | 0.001** | 3.51e-4 | 0.001** | 3.73e-4 | 0.001** | 3.74e-4 |
| Promotion to full professor | 0.003 | 0.01 | -0.02 | 0.02 | -0.02 | 0.02 |
| Candidate h-index |  |  | 2.74e-5 | 0.001 | -2.01e-5 | 0.001 |
| PI grants |  |  | 0.005*** | 0.001 | 0.004*** | 0.001 |
| Candidate gender |  |  |  |  | -0.03 | 0.02 |
| Candidate URM |  |  |  |  | 0.01 | 0.03 |
| Random Effects | Var | SD | Var | SD | Var | SD |
| P&T candidate | 0.02 | 0.14 | 0.02 | 0.13 | 0.02 | 0.13 |
| Error | 0.08 | 0.28 | 0.08 | 0.29 | 0.08 | 0.29 |
| Observations | 4039 | | 3276 | | 3262 | |
| Marginal *R*2 | .09 | | .11 | | .11 | |
| Conditional *R*2 | .27 | | .26 | | .26 | |

**Table S3. Multilevel regression results for letter writer patent count predicting I&E language.** Promotion to full professor is coded 1 for candidates seeking Promotion to full professor and 0 for candidates seeking promotion to associate professor. with tenure Candidate h-index is centered at the grand mean. PI grants refers to the number of external grants awarded as principal investigator. Candidate gender is coded 1 for women and 0 for men. Candidate URM is coded 1 for URM candidates and 0 for non-URM candidates. Institution and discipline are also included as controls for all three models but are not presented due to the large number of parameters. * p < .05; ** p < .01; *** p < .001.

|  | Model 1 | | Model 2 | | Model 3 | |
| --- | --- | --- | --- | --- | --- | --- |
| Variable | B | SE | B | SE | B | SE |
| I&E language | 0.13*** | 0.04 | 0.12** | 0.04 | 0.12** | 0.04 |
| Promotion to full professor | 0.05*** | 0.01 | 0.07*** | 0.02 | 0.07*** | 0.02 |
| Candidate h-index |  |  | -0.001 | 0.001 | -0.001 | 0.001 |
| PI grants |  |  | -0.002 | 0.001 | -0.002 | 0.001 |
| Candidate gender |  |  |  |  | -0.01 | 0.02 |
| Candidate URM |  |  |  |  | 0.01 | 0.03 |
| *R*2 | .10 | | .08 | | .08 | |
| *F* | 5.26 | | 3.43 | | 3.11 | |
| *N* | 668 | | 535 | | 532 | |

**Table S4. OLS regression results for I&E language predicting department committee negative vote percentage.** I&E language is aggregated at the candidate level. Promotion to full professor is coded 1 for candidates seeking Promotion to full professor and 0 for candidates seeking promotion to associate professor. with tenure Candidate h-index is centered at the grand mean. PI grants refers to the number of external grants awarded as principal investigator. Candidate gender is coded 1 for women and 0 for men. Candidate URM is coded 1 for URM candidates and 0 for non-URM candidates. Institution and discipline are also included as controls for all three models but are not presented due to the large number of parameters. * p < .05; ** p < .01; *** p < .001.

|  | Model 1 | | Model 2 | | Model 3 | |
| --- | --- | --- | --- | --- | --- | --- |
| Variable | B | SE | B | SE | B | SE |
| I&E language | 0.08 | 0.05 | 0.09 | 0.05 | 0.08 | 0.05 |
| Promotion to full professor | 0.07*** | 0.02 | 0.11*** | 0.02 | 0.12*** | 0.02 |
| Candidate h-index |  |  | -0.002* | 0.001 | -0.003* | 0.001 |
| PI grants |  |  | -0.003 | 0.001 | -0.003 | 0.001 |
| Candidate gender |  |  |  |  | -0.03 | 0.02 |
| Candidate URM |  |  |  |  | -0.03 | 0.04 |
| *R*2 | .08 | | .08 | | .09 | |
| *F* | 4.62 | | 3.48 | | 3.44 | |
| *N* | 686 | | 548 | | 545 | |

**Table S5. OLS regression results for I&E language predicting college committee negative vote percentage.** I&E language is aggregated at the candidate level. Promotion to full professor is coded 1 for candidates seeking Promotion to full professor and 0 for candidates seeking promotion to associate professor. with tenure Candidate h-index is centered at the grand mean. PI grants refers to the number of external grants awarded as principal investigator. Candidate gender is coded 1 for women and 0 for men. Candidate URM is coded 1 for URM candidates and 0 for non-URM candidates. Institution and discipline are also included as controls for all three models but are not presented due to the large number of parameters. * p < .05; ** p < .01; *** p < .001.

|  | Model 1 | | Model 2 | | Model 3 | |
| --- | --- | --- | --- | --- | --- | --- |
| Variable | B | SE | B | SE | B | SE |
| Candidate patent count | 3.68e-4 | 0.001 | 0.001 | 0.002 | 0.001 | 0.001 |
| Promotion to full professor | 0.05** | 0.01 | 0.07*** | 0.02 | 0.06*** | 0.02 |
| Candidate h-index |  |  | -0.001 | 0.001 | -0.001 | 0.001 |
| PI grants |  |  | -0.001 | 0.001 | -0.001 | 0.001 |
| Candidate gender |  |  |  |  | -0.02 | 0.02 |
| Candidate URM |  |  |  |  | 0.02 | 0.03 |
| *R*2 | .07 | | .07 | | .06 | |
| *F* | 3.85 | | 2.99 | | 2.73 | |
| *N* | 725 | | 571 | | 566 | |

**Table S6. OLS regression results for candidate patent count predicting department committee negative vote percentage.** Promotion to full professor is coded 1 for candidates seeking Promotion to full professor and 0 for candidates seeking promotion to associate professor. with tenure Candidate h-index is centered at the grand mean. PI grants refers to the number of external grants awarded as principal investigator. Candidate gender is coded 1 for women and 0 for men. Candidate URM is coded 1 for URM candidates and 0 for non-URM candidates. Institution and discipline are also included as controls for all three models but are not presented due to the large number of parameters. * p < .05; ** p < .01; *** p < .001.

|  | Model 1 | | Model 2 | | Model 3 | |
| --- | --- | --- | --- | --- | --- | --- |
| Variable | B | SE | B | SE | B | SE |
| Candidate patent count | -0.002 | 0.001 | -0.001 | 0.002 | -0.001 | 0.002 |
| Promotion to full professor | 0.08*** | 0.02 | 0.12*** | 0.02 | 0.12*** | 0.02 |
| Candidate h-index |  |  | -0.003 | 0.001 | -0.003* | 0.001 |
| PI grants |  |  | -0.002 | 0.001 | -0.002 | 0.001 |
| Candidate gender |  |  |  |  | -0.01 | 0.02 |
| Candidate URM |  |  |  |  | -0.04 | 0.04 |
| *R*2 | .08 | | .07 | | .08 | |
| *F* | 4.73 | | 3.27 | | 3.28 | |
| *N* | 749 | | 584 | | 579 | |

**Table S7. OLS regression results for candidate patent count predicting college committee negative vote percentage.** Promotion to full professor is coded 1 for candidates seeking Promotion to full professor and 0 for candidates seeking promotion to associate professor. with tenure Candidate h-index is centered at the grand mean. PI grants refers to the number of external grants awarded as principal investigator. Candidate gender is coded 1 for women and 0 for men. Candidate URM is coded 1 for URM candidates and 0 for non-URM candidates. Institution and discipline are also included as controls for all three models but are not presented due to the large number of parameters. * p < .05; ** p < .01; *** p < .001.

|  | Model 1 | | Model 2 | | Model 3 | |
| --- | --- | --- | --- | --- | --- | --- |
| Variable | B | SE | B | SE | B | SE |
| Has patent | 0.02 | 0.02 | 0.05** | 0.02 | 0.05** | 0.02 |
| Promotion to full professor | 0.05*** | 0.01 | 0.07*** | 0.02 | 0.07*** | 0.02 |
| Candidate h-index |  |  | -0.001 | 0.001 | -0.001 | 0.001 |
| PI grants |  |  | -0.001 | 0.001 | -0.001 | 0.001 |
| Candidate gender |  |  |  |  | -0.01 | 0.02 |
| Candidate URM |  |  |  |  | 0.02 | 0.03 |
| *R*2 | .07 | | .08 | | .07 | |
| *F* | 5.19 | | 3.33 | | 3.05 | |
| *N* | 725 | | 571 | | 566 | |

**Table S8. OLS regression results for having a patent predicting department committee negative vote percentage.** Promotion to full professor is coded 1 for candidates seeking Promotion to full professor and 0 for candidates seeking promotion to associate professor. with tenure Candidate h-index is centered at the grand mean. PI grants refers to the number of external grants awarded as principal investigator. Candidate gender is coded 1 for women and 0 for men. Candidate URM is coded 1 for URM candidates and 0 for non-URM candidates. Institution and discipline are also included as controls for all three models but are not presented due to the large number of parameters. * p < .05; ** p < .01; *** p < .001.

|  | Model 1 | | Model 2 | | Model 3 | |
| --- | --- | --- | --- | --- | --- | --- |
| Variable | B | SE | B | SE | B | SE |
| Has patent | 0.004 | 0.02 | 0.03 | 0.02 | 0.02 | 0.02 |
| Promotion to full professor | 0.08*** | 0.02 | 0.12*** | 0.02 | 0.12*** | 0.03 |
| Candidate h-index |  |  | -0.003** | 0.001 | -0.003** | 0.001 |
| PI grants |  |  | -0.003 | 0.001 | -0.002 | 0.001 |
| Candidate gender |  |  |  |  | -0.01 | 0.02 |
| Candidate URM |  |  |  |  | -0.04 | 0.04 |
| *R*2 | .08 | | .07 | | .08 | |
| *F* | 4.63 | | 3.35 | | 3.29 | |
| *N* | 749 | | 584 | | 579 | |

**Table S9. OLS regression results for having a patent predicting college committee negative vote percentage.** Promotion to full professor is coded 1 for candidates seeking Promotion to full professor and 0 for candidates seeking promotion to associate professor. with tenure Candidate h-index is centered at the grand mean. PI grants refers to the number of external grants awarded as principal investigator. Candidate gender is coded 1 for women and 0 for men. Candidate URM is coded 1 for URM candidates and 0 for non-URM candidates. Institution and discipline are also included as controls for all three models but are not presented due to the large number of parameters. * p < .05; ** p < .01; *** p < .001.

|  | Model 1 | | Model 2 | | Model 3 | |
| --- | --- | --- | --- | --- | --- | --- |
| Variable | OR | 95% CI | OR | 95% CI | OR | 95% CI |
| I&E language | 0.23** | 0.10-0.57 | 0.21** | 0.07-0.60 | 0.19** | 0.06-0.56 |
| Promotion to full professor | 0.71 | 0.49-1.01 | 0.66 | 0.42-1.04 | 0.67 | 0.43-0.1.05 |
| Candidate h-index |  |  | 0.99 | 0.97-1.01 | 0.99 | 0.97-1.01 |
| PI grants |  |  | 1.01 | 0.98-1.04 | 1.01 | 0.98-1.04 |
| Candidate gender |  |  |  |  | 0.76 | 0.48-1.22 |
| Candidate URM |  |  |  |  | 0.82 | 0.36-1.85 |
| Nagelkerke *R*2 | .26 | | .24 | | .25 | |
| *N* | 668 | | 535 | | 532 | |

**Table S10. Logistic regression results for I&E language predicting department committee unanimous votes.** OR refers to odds ratios. 95% CI refers to 95% confidence intervals. I&E language is aggregated at the candidate level. Promotion to full professor is coded 1 for candidates seeking Promotion to full professor and 0 for candidates seeking promotion to associate professor. with tenure Candidate h-index is centered at the grand mean. PI grants refers to the number of external grants awarded as principal investigator. Candidate gender is coded 1 for women and 0 for men. Candidate URM is coded 1 for URM candidates and 0 for non-URM candidates. Institution and discipline are also included as controls for all three models but are not presented due to the large number of parameters. * p < .05; ** p < .01; *** p < .001.

|  | Model 1 | | Model 2 | | Model 3 | |
| --- | --- | --- | --- | --- | --- | --- |
| Variable | OR | 95% CI | OR | 95% CI | OR | 95% CI |
| I&E language | 0.38* | 0.16-0.90 | 0.29* | 0.10-0.81 | 0.37* | 0.11-0.86 |
| Promotion to full professor | 0.36*** | 0.25-0.53 | 0.22*** | 0.13-0.36 | 0.20*** | 0.12-0.33 |
| Candidate h-index |  |  | 1.03* | 1.00-1.05 | 1.03* | 1.00-1.05 |
| PI grants |  |  | 1.04* | 1.01-1.07 | 1.04* | 1.01-1.08 |
| Candidate gender |  |  |  |  | 1.35 | 0.80-2.26 |
| Candidate URM |  |  |  |  | 1.67 | 0.44-4.04 |
| Nagelkerke *R*2 | .20 | | .25 | | .27 | |
| *N* | 686 | | 548 | | 545 | |

**Table S11. Logistic regression results for I&E language predicting college committee unanimous votes.** OR refers to odds ratios. 95% CI refers to 95% confidence intervals. I&E language is aggregated at the candidate level. Promotion to full professor is coded 1 for candidates seeking Promotion to full professor and 0 for candidates seeking promotion to associate professor. with tenure Candidate h-index is centered at the grand mean. PI grants refers to the number of external grants awarded as principal investigator. Candidate gender is coded 1 for women and 0 for men. Candidate URM is coded 1 for URM candidates and 0 for non-URM candidates. Institution and discipline are also included as controls for all three models but are not presented due to the large number of parameters. * p < .05; ** p < .01; *** p < .001.

|  | Model 1 | | Model 2 | | Model 3 | |
| --- | --- | --- | --- | --- | --- | --- |
| Variable | OR | 95% CI | OR | 95% CI | OR | 95% CI |
| Candidate patent count | 0.99 | 0.97-1.04 | 1.00 | 0.97-1.04 | 1.00 | 0.97-1.04 |
| Promotion to full professor | 0.76 | 0.54-1.07 | 0.71 | 0.47-1.10 | 0.72 | 0.47-1.12 |
| Candidate h-index |  |  | 0.99 | 0.97-1.01 | 0.99 | 0.97-1.01 |
| PI grants |  |  | 0.99 | 0.97-1.02 | 0.99 | 0.97-1.02 |
| Candidate gender |  |  |  |  | 0.77 | 0.49-1.21 |
| Candidate URM |  |  |  |  | 0.81 | 0.36-1.82 |
| Nagelkerke *R*2 | .23 | | .22 | | .23 | |
| *N* | 725 | | 571 | | 566 | |

**Table S12. Logistic regression results for candidate patent count predicting department committee unanimous votes.** OR refers to odds ratios. 95% CI refers to 95% confidence intervals. Promotion to full professor is coded 1 for candidates seeking Promotion to full professor and 0 for candidates seeking promotion to associate professor. with tenure Candidate h-index is centered at the grand mean. PI grants refers to the number of external grants awarded as principal investigator. Candidate gender is coded 1 for women and 0 for men. Candidate URM is coded 1 for URM candidates and 0 for non-URM candidates. Institution and discipline are also included as controls for all three models but are not presented due to the large number of parameters. * p < .05; ** p < .01; *** p < .001.

|  | Model 1 | | Model 2 | | Model 3 | |
| --- | --- | --- | --- | --- | --- | --- |
| Variable | OR | 95% CI | OR | 95% CI | OR | 95% CI |
| Candidate patent count | 1.01 | 0.98-1.05 | 1.00 | 0.97-1.04 | 1.00 | 0.97-1.04 |
| Promotion to full professor | 0.36*** | 0.25-0.51 | 0.21*** | 0.13-0.34 | 0.19*** | 0.12-0.31 |
| Candidate h-index |  |  | 1.03* | 1.00-1.06 | 1.03* | 1.00-1.06 |
| PI grants |  |  | 1.03* | 1.00-1.06 | 1.03* | 1.00-1.06 |
| Candidate gender |  |  |  |  | 1.28 | 0.78-2.10 |
| Candidate URM |  |  |  |  | 1.78 | 0.75-4.25 |
| Nagelkerke *R*2 | .18 | | .23 | | .29 | |
| *N* | 749 | | 584 | | 579 | |

**Table S13. Logistic regression results for candidate patent count predicting college committee unanimous votes.** OR refers to odds ratios. 95% CI refers to 95% confidence intervals. Promotion to full professor is coded 1 for candidates seeking Promotion to full professor and 0 for candidates seeking promotion to associate professor. with tenure Candidate h-index is centered at the grand mean. PI grants refers to the number of external grants awarded as principal investigator. Candidate gender is coded 1 for women and 0 for men. Candidate URM is coded 1 for URM candidates and 0 for non-URM candidates. Institution and discipline are also included as controls for all three models but are not presented due to the large number of parameters. * p < .05; ** p < .01; *** p < .001.

|  | Model 1 | | Model 2 | | Model 3 | |
| --- | --- | --- | --- | --- | --- | --- |
| Variable | OR | 95% CI | OR | 95% CI | OR | 95% CI |
| Has patent | 0.77 | 0.52-1.14 | 0.73 | 0.48-1.12 | 0.71 | 0.45-1.08 |
| Promotion to full professor | 0.75 | 0.54-1.06 | 0.70 | 0.45-1.07 | 0.70 | 0.45-1.09 |
| Candidate h-index |  |  | 0.99 | 0.98-1.01 | 0.99 | 0.97-1.01 |
| PI grants |  |  | 1.00 | 0.97-1.02 | 0.99 | 0.97-1.01 |
| Candidate gender |  |  |  |  | 0.75 | 0.47-1.18 |
| Candidate URM |  |  |  |  | 0.82 | 0.37-1.86 |
| Nagelkerke *R*2 | .23 | | .23 | | .23 | |
| *N* | 725 | | 571 | | 566 | |

**Table S14. Logistic regression results for having a patent predicting department committee unanimous votes.** OR refers to odds ratios. 95% CI refers to 95% confidence intervals. Promotion to full professor is coded 1 for candidates seeking Promotion to full professor and 0 for candidates seeking promotion to associate professor. with tenure Candidate h-index is centered at the grand mean. PI grants refers to the number of external grants awarded as principal investigator. Candidate gender is coded 1 for women and 0 for men. Candidate URM is coded 1 for URM candidates and 0 for non-URM candidates. Institution and discipline are also included as controls for all three models but are not presented due to the large number of parameters. * p < .05; ** p < .01; *** p < .001.

|  | Model 1 | | Model 2 | | Model 3 | |
| --- | --- | --- | --- | --- | --- | --- |
| Variable | OR | 95% CI | OR | 95% CI | OR | 95% CI |
| Has patent | 1.29 | 0.87-1.92 | 1.12 | 0.72-1.76 | 1.18 | 0.75-1.87 |
| Promotion to full professor | 0.36*** | 0.25-0.51 | 0.21*** | 0.13-0.35 | 0.20*** | 0.12-0.32 |
| Candidate h-index |  |  | 1.03* | 1.00-1.05 | 1.03* | 1.00-1.05 |
| PI grants |  |  | 1.03* | 1.00-1.06 | 1.03* | 1.00-1.06 |
| Candidate gender |  |  |  |  | 1.29 | 0.78-2.12 |
| Candidate URM |  |  |  |  | 1.76 | 0.74-4.20 |
| Nagelkerke *R*2 | .18 | | .23 | | .25 | |
| *N* | 749 | | 584 | | 579 | |

**Table S15. Logistic regression results for having a patent predicting college committee unanimous votes.** OR refers to odds ratios. 95% CI refers to 95% confidence intervals. Promotion to full professor is coded 1 for candidates seeking Promotion to full professor and 0 for candidates seeking promotion to associate professor. with tenure Candidate h-index is centered at the grand mean. PI grants refers to the number of external grants awarded as principal investigator. Candidate gender is coded 1 for women and 0 for men. Candidate URM is coded 1 for URM candidates and 0 for non-URM candidates. Institution and discipline are also included as controls for all three models but are not presented due to the large number of parameters. * p < .05; ** p < .01; *** p < .001.

|  | Model 1 | | Model 2 | | Model 3 | |
| --- | --- | --- | --- | --- | --- | --- |
| Variable | OR | 95% CI | OR | 95% CI | OR | 95% CI |
| I&E language | 0.19* | 0.05-0.70 | 0.11** | 0.02-0.59 | 0.11** | 0.02-0.56 |
| Promotion to full professor | 0.54 | 0.25-1.15 | 0.33* | 0.12-0.91 | 0.33* | 0.12-0.91 |
| Candidate h-index |  |  | 1.02 | 0.96-1.08 | 1.02 | 0.96-1.08 |
| PI grants |  |  | 1.10 | 1.00-1.20 | 1.09 | 1.00-1.20 |
| Candidate gender |  |  |  |  | 0.65 | 0.23-1.83 |
| Candidate URM |  |  |  |  | 1.70 | 0.20-14.60 |
| Nagelkerke *R*2 | .21 | | .26 | | .27 | |
| *N* | 610 | | 482 | | 479 | |

**Table S16. Logistic regression results for I&E language predicting the Provost vote.** OR refers to odds ratios. 95% CI refers to 95% confidence intervals. I&E language is aggregated at the candidate level. Promotion to full professor is coded 1 for candidates seeking Promotion to full professor and 0 for candidates seeking promotion to associate professor. with tenure Candidate h-index is centered at the grand mean. PI grants refers to the number of external grants awarded as principal investigator. Candidate gender is coded 1 for women and 0 for men. Candidate URM is coded 1 for URM candidates and 0 for non-URM candidates. Institution and discipline are also included as controls for all three models but are not presented due to the large number of parameters. * p < .05; ** p < .01; *** p < .001.

|  | Model 1 | | Model 2 | | Model 3 | |
| --- | --- | --- | --- | --- | --- | --- |
| Variable | OR | 95% CI | OR | 95% CI | OR | 95% CI |
| Candidate patent count | 1.01 | 0.95-1.07 | 0.98 | 0.92-1.04 | 0.98 | 0.92-1.04 |
| Promotion to full professor | 0.64 | 0.33-1.25 | 0.37* | 0.14-0.96 | 0.36* | 0.09-0.96 |
| Candidate h-index |  |  | 1.05 | 0.98-1.12 | 1.04 | 0.96-1.11 |
| PI grants |  |  | 1.05 | 0.97-1.12 | 1.04 | 0.96-1.12 |
| Candidate gender |  |  |  |  | 0.64 | 0.18-1.66 |
| Candidate URM |  |  |  |  | 0.85 | 0.17-4.23 |
| Nagelkerke *R*2 | .15 | | .20 | | .20 | |
| *N* | 678 | | 517 | | 510 | |

**Table S17. Logistic regression results for candidate patent count predicting the Provost vote.** OR refers to odds ratios. 95% CI refers to 95% confidence intervals. Promotion to full professor is coded 1 for candidates seeking Promotion to full professor and 0 for candidates seeking promotion to associate professor. with tenure Candidate h-index is centered at the grand mean. PI grants refers to the number of external grants awarded as principal investigator. Candidate gender is coded 1 for women and 0 for men. Candidate URM is coded 1 for URM candidates and 0 for non-URM candidates. Institution and discipline are also included as controls for all three models but are not presented due to the large number of parameters. * p < .05; ** p < .01; *** p < .001.

|  | Model 1 | | Model 2 | | Model 3 | |
| --- | --- | --- | --- | --- | --- | --- |
| Variable | OR | 95% CI | OR | 95% CI | OR | 95% CI |
| Has patent | 0.82 | 0.40-1.70 | 0.32* | 0.12-0.85 | 0.32* | 0.12-0.88 |
| Promotion to full professor | 0.64 | 0.33-1.26 | 0.33* | 0.12-0.87 | 0.33* | 0.12-0.89 |
| Candidate h-index |  |  | 1.06 | 0.99-1.13 | 1.05 | 0.99-1.12 |
| PI grants |  |  | 1.06 | 0.99-1.15 | 1.06 | 0.98-1.14 |
| Candidate gender |  |  |  |  | 0.61 | 0.23-1.62 |
| Candidate URM |  |  |  |  | 0.85 | 0.17-4.31 |
| Nagelkerke *R*2 | .15 | | .22 | | .23 | |
| *N* | 678 | | 517 | | 510 | |

**Table S18. Logistic regression results for having a patent predicting the Provost vote.** OR refers to odds ratios. 95% CI refers to 95% confidence intervals. Promotion to full professor is coded 1 for candidates seeking Promotion to full professor and 0 for candidates seeking promotion to associate professor. with tenure Candidate h-index is centered at the grand mean. PI grants refers to the number of external grants awarded as principal investigator. Candidate gender is coded 1 for women and 0 for men. Candidate URM is coded 1 for URM candidates and 0 for non-URM candidates. Institution and discipline are also included as controls for all three models but are not presented due to the large number of parameters. * p < .05; ** p < .01; *** p < .001.

|  | Department Negative Vote % | | College Negative Vote % | |
| --- | --- | --- | --- | --- |
| Variable | β | 95% CI | β | 95% CI |
| I&E language | **0.73** | **0.15, 1.32** | 0.20 | -0.53, 0.91 |
| Promotion to full professor | **0.49** | **0.21, 0.79** | **0.99** | **0.61, 1.37** |
| Candidate h-index | -0.00 | -0.02, 0.01 | **-0.03** | **-0.04, -0.01** |
| PI grants | -0.01 | -0.03, 0.01 | -0.02 | -0.04, 0.00 |
| Candidate gender | -0.15 | -0.45, 0.15 | -0.12 | -0.49. 0.24 |
| Candidate URM | 0.21 | -0.27, 0.71 | -0.13 | -0.78, 0.47 |
| *N* | 532 | | 545 | |

**Table S19. Ordered beta regression results for I&E language predicting committee negative vote percentage.** I&E language is aggregated at the candidate level. Promotion to full professor is coded 1 for candidates seeking Promotion to full professor and 0 for candidates seeking promotion to associate professor. with tenure Candidate h-index is centered at the grand mean. PI grants refers to the number of external grants awarded as principal investigator. Candidate gender is coded 1 for women and 0 for men. Candidate URM is coded 1 for URM candidates and 0 for non-URM candidates. Institution and discipline are also included as controls but are not presented due to the large number of parameters. Estimates in **bold** are significant at p < .05.

|  | Department Negative Vote % | | College Negative Vote % | |
| --- | --- | --- | --- | --- |
| Variable | β | 95% CI | β | 95% CI |
| Candidate patent count | 0.02 | -0.01, 0.04 | -0.01 | -0.03, 0.02 |
| Promotion to full professor | **0.49** | **0.21, 0.77** | **1.02** | **0.65, 1.37** |
| Candidate h-index | -0.01 | -0.02, 0.01 | **-0.02** | **-0.04, -0.01** |
| PI grants | -0.01 | -0.03, 0.01 | -0.01 | -0.03, 0.01 |
| Candidate gender | -0.15 | -0.45, 0.15 | -0.00 | -0.35, 0.35 |
| Candidate URM | 0.21 | -0.30, 0.72 | -0.13 | -0.82, 0.53 |
| *N* | 566 | | 579 | |

**Table S20. Ordered beta regression results for candidate patent count predicting committee negative vote percentage.** Promotion to full professor is coded 1 for candidates seeking Promotion to full professor and 0 for candidates seeking promotion to associate professor. with tenure Candidate h-index is centered at the grand mean. PI grants refers to the number of external grants awarded as principal investigator. Candidate gender is coded 1 for women and 0 for men. Candidate URM is coded 1 for URM candidates and 0 for non-URM candidates. Institution and discipline are also included as controls but are not presented due to the large number of parameters. Estimates in **bold** are significant at p < .05.

|  | Department Negative Vote % | | College Negative Vote % | |
| --- | --- | --- | --- | --- |
| Variable | β | 95% CI | β | 95% CI |
| Has patent | **0.34** | **0.07, 0.61** | 0.04 | -0.28, 0.36 |
| Promotion to full professor | **0.54** | **0.24, 0.85** | **1.03** | **0.67, 1.40** |
| Candidate h-index | -0.01 | -0.02, 0.01 | **-0.03** | **-0.05, -0.01** |
| PI grants | -0.01 | -0.03, 0.01 | -0.01 | -0.03, 0.00 |
| Candidate gender | -0.12 | -0.41, 0.17 | -0.00 | -0.35, 0.35 |
| Candidate URM | 0.20 | -0.31, 0.66 | -0.14 | -0.80, 0.47 |
| *N* | 566 | | 579 | |

**Table S21. Ordered beta regression results for having a patent predicting committee negative vote percentage.** I&E language is aggregated at the candidate level. Promotion to full professor is coded 1 for candidates seeking Promotion to full professor and 0 for candidates seeking promotion to associate professor. with tenure Candidate h-index is centered at the grand mean. PI grants refers to the number of external grants awarded as principal investigator. Candidate gender is coded 1 for women and 0 for men. Candidate URM is coded 1 for URM candidates and 0 for non-URM candidates. Institution and discipline are also included as controls but are not presented due to the large number of parameters. Estimates in **bold** are significant at p < .05.
